# Supplementary material
Source: publisher figshare collection journal article supplement (https://frontiersin.figshare.com/ndownloader/files/33961112)
Supplement: Supplementary file 1 [file 33961112]

**Expectations and perception of the Personal Tutor Scheme (PTS) at Kingston University**

1. How would you describe yourself? Tick as many as apply.

- I am curious and creative.
- I am keen to learn and to gain new experiences.
- I am very independent, also in my studies.
- I am a very agreeable person.
- I am efficient and organised.
- I am an insecure person, so I prefer to have guidance in many things I do.
- I gain energy from social activity, which I usually prefer over studying,
- I am generally anxious about my studies.

1. How would you score your engagement with your course? Tick ONE choice.
2. How would you score your academic abilities? Tick ONE choice.
3. How did you come to know about the Personal Tutor Scheme? Tick ONE choice.

- A fellow student told me.
- I was told during induction week.
- My tutor contacted me and explained.
- I read about it on MyKingston.
- Other:_______________________

1. How did you find out who your personal tutor was? Tick ONE choice.

- I was told during induction week
- My personal tutor contacted me
- His/her name was shown on MyKingston
- Other:__________________________

1. When you started at university, which characteristics were you expecting in a personal tutor?Tick as many as apply.

- Empathetic
- Responsive
- Available
- Friendly
- Approachable
- Non-judgemental
- Supportive
- Caring
- Knowledgeable
- Proactive

1. Which of the following best describe **your** personal tutor? Tick as many as apply.

- Empathetic
- Responsive
- Available
- Friendly
- Approachable
- Non-judgemental
- Supportive
- Caring
- Knowledgeable
- Proactive

1. Did you have a change of personal tutor during your studies? Tick ONE choice.

- No
- Yes. If so, why?__________________________________________

1. How many times have you met your personal tutor this academic year? Tick ONE choice.

- I didn’t meet my personal tutor
- Only once
- 2 -3 times
- 4 times or more

1. What type of meetings do you prefer to have? Tick ONE choice.

- One to one
- Group meeting
- No preference

1. During your last meeting, did your personal tutor sign you off online (i.e. on OSIS)? Tick ONE choice.

- Yes
- No, because__________________________________
- Not sure

1. Are meetings with your personal tutor compulsory on your course? Tick ONE choice.

- Yes
- No
- Not sure

1. Do you think the meetings should be compulsory? Tick ONE choice.

- Yes. If yes, how many times a year?_____________________________
- No

1. Are any of your assessments marked by your personal tutor?

- Yes.
- No

1. Do you think some assessments should be linked to the PTS?

- Yes. If yes, how many times a year?_____________________________
- No

1. For each of the following statements, please select ONE option that applies to you the most.

| **Statement** | **Strongly agree** | **Agree** | **Disagree** | **Strongly disagree** |
| --- | --- | --- | --- | --- |
| 1. I fully trust my personal tutor. |  |  |  |  |
| 1. I always participated to sessions with my personal tutor. |  |  |  |  |
| 1. I was expecting more support from my personal tutor. |  |  |  |  |
| 1. My personal tutor helped me in developing employability skills. |  |  |  |  |
| 1. My personal tutor helped me in developing transferable skills. |  |  |  |  |
| 1. My personal tutor helped me with my learning on my course. |  |  |  |  |
| 1. My personal tutor always gives me the right advice. |  |  |  |  |
| 1. My personal tutor helped me in developing my CV. |  |  |  |  |
| 1. I am happy with my personal tutor. |  |  |  |  |
| 1. I know my personal tutor can refer me to other support systems within the university, e.g. Money Advice, Health & Wellbeing, etc. |  |  |  |  |
| 1. My tutor and I developed a friendship. |  |  |  |  |

**Demographics**

1. Your age:

🞎 18-24 🞎 25-30 🞎 31+

1. Gender

🞎 Male 🞎 Female

1. Ethnicity

🞎 Asian or Asian British- Bangladeshi

🞎 Asian or Asian British- Indian

🞎 Asian or Asian British – Pakistani

🞎 Black or Black British – African

🞎 Black or Black British – Caribbean

🞎 Chinese

🞎 Irish Traveller

🞎 Mixed- White & Asian

🞎 Mixed- White & Black African

🞎 Mixed – White & Black Caribbean

🞎 Other Asian background

🞎 Other Black background

🞎 Other Mixed Background

🞎 White- British

🞎 White- Irish

🞎 White- any other background

🞎 Others, please specify:

1. Do you consider yourself to have any disability?

🞎 No 🞎Yes, Please specify: __________________________________

1. Name your course of study: _______________________________________
2. Level of study

🞎 Foundation 🞎 Year 1 🞎 Year 2 🞎 Year 3 🞎 Year 4

1. University entry qualification (Tick as appropriate)

🞎 A-level 🞎 Foundation year/degree 🞎 NVQ

🞎 Other undergraduate course 🞎 BTEC

🞎 Other UK qualification, Please specify ______________________________________

🞎 Overseas Qualification, Please specify ______________________________________

Thank you for your time and contribution. If you would like to make a further comment, please do in the box below.
